# Supplementary material for: Prevalence of Clinical Signs Within Reference Ranges Among Hospitalized Patients Prescribed Antibiotics for Pneumonia
Source: PubMed Central journal article supplement (PMC7368172; doi:10.1001/jamanetworkopen.2020.10700), 2020-07-17
Supplement: jamanetwopen-3-e2010700-s001.pdf [file jamanetwopen-3-e2010700-s001.pdf]

## Supplementary Online Content

Klompas M, Ochoa A, Ji W, et al; CDC Prevention Epicenters Program. Prevalence of clinical signs within reference ranges among hospitalized patients prescribed antibiotics for pneumonia. *JAMA Netw Open*. 2020;3(7):e2010700.  
doi:10.1001/jamanetworkopen.2020.10700

**eTable 1.** Clinical Signs on the First Day of Antibiotics Stratified by Hospital

**eTable 2.** Duration of Antibiotics Relative to Clinical Signs Stratified by Hospital

**eTable 3.** Clinical Signs on the First Day of Antibiotics

**eTable 4.** Duration of Antibiotics Relative to Clinical Signs

**eTable 5.** Clinical Signs on the First Day of Antibiotics in Immunocompetent vs Immunocompromised Patients

**eTable 6.** Duration of Antibiotics Relative to Clinical Signs in Immunocompetent vs Immunocompromised Patients

This supplementary material has been provided by the authors to give readers additional information about their work.

**eTable 1.** Clinical signs on the first day of antibiotics stratified by hospital

|                                                                                                            | Academic Medical Center 1<br>N=3814 |               | Academic Medical Center 2<br>N=5827 |               | Community Hospital 1<br>N=1161 |               | Community Hospital 2<br>N=1471 |               |
|------------------------------------------------------------------------------------------------------------|-------------------------------------|---------------|-------------------------------------|---------------|--------------------------------|---------------|--------------------------------|---------------|
|                                                                                                            | HAP<br>N=1031                       | CAP<br>N=2783 | HAP<br>N=1380                       | CAP<br>N=4447 | HAP<br>N=129                   | CAP<br>N=1069 | HAP<br>N=193                   | CAP<br>N=1278 |
| <b>Frequency of normal clinical signs on first day of antibiotics, N (%)</b>                               |                                     |               |                                     |               |                                |               |                                |               |
| Maximum temperature >36 and <38° C                                                                         | 722 (70.0)                          | 2194 (78.8)   | 972 (70.4)                          | 3546 (79.7)   | 102 (79.1)                     | 859 (83.2)    | 139 (72.0)                     | 900 (70.4)    |
| Median daily respiratory rate <22 breaths/minute                                                           | 793 (76.9)                          | 2234 (80.3)   | 1161 (84.1)                         | 3862 (86.9)   | 115 (89.2)                     | 842 (81.6)    | 113 (58.6)                     | 841 (65.8)    |
| White blood cell count >4,000 and <12,000 cells/mm <sup>3</sup>                                            | 471 (45.7)                          | 1513 (54.4)   | 667 (48.3)                          | 2395 (53.9)   | 75 (58.1)                      | 650 (63.0)    | 113 (58.6)                     | 695 (54.4)    |
| Not on supplemental oxygen                                                                                 | 543 (52.7)                          | 1443 (51.9)   | 730 (52.9)                          | 2363 (53.1)   | 86 (66.7)                      | 568 (55.0)    | 109 (56.5)                     | 654 (51.2)    |
| Oxygen saturation ≥95% without supplemental oxygen                                                         | 377 (36.6)                          | 1120 (40.2)   | 465 (33.7)                          | 1752 (39.4)   | 49 (38.0)                      | 404 (39.2)    | 64 (33.2)                      | 441 (34.5)    |
| Median respiratory rate <22 breaths/min and oxygen saturation ≥95% without supplemental oxygen             | 337 (32.7)                          | 1040 (37.4)   | 446 (32.3)                          | 1709 (38.4)   | 49 (38.0)                      | 377 (36.5)    | 45 (23.3)                      | 380 (29.7)    |
| All signs normal                                                                                           | 125 (12.1)                          | 489 (17.6)    | 189 (13.7)                          | 866 (19.5)    | 30 (23.3)                      | 230 (22.3)    | 26 (13.5)                      | 194 (15.2)    |
| <b>Days until clinical signs normal for patients with abnormal sign(s) on the first day of antibiotics</b> |                                     |               |                                     |               |                                |               |                                |               |
| Temperature, Mean (SD)                                                                                     | 1.9 (1.6)                           | 1.8 (1.6)     | 2.1 (2.2)                           | 1.6 (1.3)     | 1.6 (0.9)                      | 1.3 (0.7)     | 1.7 (1.6)                      | 1.5 (0.9)     |
| Temperature, Median (IQR)                                                                                  | 1 (1-2)                             | 1 (1-2)       | 1 (1-2)                             | 1 (1-2)       | 1 (1-2)                        | 1 (1-1)       | 1 (1-2)                        | 1 (1-2)       |
| White blood cell count, Mean (SD)                                                                          | 6.1 (7.0)                           | 4.1 (4.8)     | 5.6 (6.5)                           | 3.8 (4.2)     | 4.0 (4.0)                      | 2.8 (2.5)     | 3.5 (2.9)                      | 2.7 (2.7)     |
| White blood cell count, Median (IQR)                                                                       | 3 (2-7)                             | 2 (1-5)       | 3 (2-7)                             | 2 (1-4)       | 2 (1-6)                        | 2 (1-3)       | 3 (1-5)                        | 2 (1-3)       |
| Median respiratory rate, Mean (SD)                                                                         | 2.6 (3.5)                           | 2.2 (2.5)     | 2.6 (2.7)                           | 1.9 (1.7)     | 2.2 (1.7)                      | 1.6 (1.5)     | 2.6 (1.9)                      | 2.7 (2.4)     |
| Median respiratory rate, Median (IQR)                                                                      | 1 (1-3)                             | 1 (1-2)       | 2 (1-3)                             | 1 (1-2)       | 2 (1-3)                        | 1 (1-2)       | 2 (1-3)                        | 2 (1-3)       |
| Off supplemental oxygen, Mean (SD)                                                                         | 3.9 (4.6)                           | 4.5 (4.2)     | 3.9 (4.0)                           | 4.3 (4.4)     | 3.4 (2.8)                      | 3.3 (3.2)     | 3.4 (2.5)                      | 3.4 (2.9)     |
| Off supplemental oxygen, Median (IQR)                                                                      | 2 (1-5)                             | 3 (2-6)       | 3 (1-5)                             | 3 (1-6)       | 3 (1-5)                        | 2 (1-4)       | 3 (2-5)                        | 3 (1-4)       |
| Off supplemental oxygen and saturation ≥95%, Mean (SD)                                                     | 6.4 (9.6)                           | 5.0 (6.1)     | 5.9 (7.8)                           | 4.8 (5.7)     | 3.2 (3.0)                      | 3.3 (3.2)     | 3.7 (3.5)                      | 3.4 (3.2)     |
| Off supplemental oxygen and saturation ≥95%, Median (IQR)                                                  | 3 (1-8)                             | 3 (1-6)       | 3 (2-7)                             | 3 (1-6)       | 2 (1-4)                        | 2 (1-4)       | 3 (2-5)                        | 2 (1-4)       |
| Median resp rate <22 and oxygen saturation ≥95%, Mean (SD)                                                 | 5.0 (5.5)                           | 3.7 (4.4)     | 4.9 (5.5)                           | 3.7 (4.6)     | 4.2 (3.8)                      | 2.9 (2.1)     | 4.2 (6.8)                      | 2.5 (3.4)     |
| Median resp rate <22 and oxygen saturation ≥95%, Median (IQR)                                              | 3 (2-6)                             | 3 (1-4)       | 3 (1-6)                             | 2 (1-5)       | 3 (2-5)                        | 2 (1-4)       | 2 (1-4)                        | 2 (1-3)       |
| All signs normal, Mean (SD)                                                                                | 7.9 (10.1)                          | 5.6 (6.5)     | 7.3 (8.3)                           | 5.3 (5.9)     | 4.4 (4.3)                      | 3.7 (3.4)     | 4.3 (3.9)                      | 3.9 (3.3)     |
| All signs normal, Median (IQR)                                                                             | 5 (2-10)                            | 3 (2-7)       | 4 (2-9)                             | 3 (2-7)       | 3 (2-6)                        | 3 (2-5)       | 3 (2-6)                        | 3 (2-5)       |

**eTable 2.** Duration of antibiotics relative to clinical signs stratified by hospital

|                                                                     | Academic Medical Center 1<br>N=3814 |               | Academic Medical Center 2<br>N=5827 |               | Community Hospital 1<br>N=1161 |               | Community Hospital 2<br>N=1471 |               |
|---------------------------------------------------------------------|-------------------------------------|---------------|-------------------------------------|---------------|--------------------------------|---------------|--------------------------------|---------------|
|                                                                     | HAP<br>N=1031                       | CAP<br>N=2783 | HAP<br>N=1380                       | CAP<br>N=4447 | HAP<br>N=129                   | CAP<br>N=1032 | HAP<br>N=193                   | CAP<br>N=1296 |
| <b>Total duration of treatment</b>                                  |                                     |               |                                     |               |                                |               |                                |               |
| All patients, Mean (SD)                                             | 7.0 (6.2)                           | 5.8 (5.7)     | 7.1 (8.3)                           | 5.8 (5.8)     | 5.3 (3.1)                      | 5.1 (6.3)     | 4.8 (3.6)                      | 4.7 (3.6)     |
| All patients, Median (IQR)                                          | 6 (3-9)                             | 5 (2-8)       | 6 (3-8)                             | 5 (2-7)       | 5 (3-7)                        | 4 (1-7)       | 4 (2-7)                        | 5 (2-6)       |
| Patients with normal signs first day of antibiotics, Mean (SD)      | 5.3 (4.3)                           | 4.9 (5.1)     | 5.9 (7.3)                           | 4.8 (6.1)     | 5.2 (3.0)                      | 4.0 (7.0)     | 4.4 (3.2)                      | 3.9 (4.2)     |
| Patients with normal signs first day of antibiotics, Median (IQR)   | 5 (2-7)                             | 4 (1-6)       | 5 (2-7)                             | 4 (1-6)       | 5 (3-7)                        | 2 (1-5)       | 4 (2-6)                        | 3 (1-5)       |
| Patients with abnormal signs first day of antibiotics, Mean (SD)    | 7.2 (6.4)                           | 6.1 (5.8)     | 7.2 (8.4)                           | 6.0 (5.7)     | 5.3 (3.1)                      | 5.4 (6.1)     | 4.8 (3.7)                      | 4.8 (3.5)     |
| Patients with abnormal signs first day of antibiotics, Median (IQR) | 6 (3-9)                             | 5 (2-8)       | 6 (3-8)                             | 5 (2-8)       | 5 (3-7)                        | 5 (2-7)       | 5 (2-7)                        | 5 (2-6)       |
| <b>Duration of treatment after all signs normal</b>                 |                                     |               |                                     |               |                                |               |                                |               |
| All patients, Mean (SD)                                             | 3.3 (5.4)                           | 2.5 (4.3)     | 3.2 (7.1)                           | 2.6 (4.7)     | 3.0 (3.7)                      | 2.8 (5.9)     | 2.2 (3.8)                      | 2.0 (3.0)     |
| All patients, Median (IQR)                                          | 0 (0-5)                             | 1 (0-4)       | 1 (0-5)                             | 1 (0-4)       | 2 (0-5)                        | 1 (0-4)       | 0 (0-4)                        | 1 (0-3)       |
| Patients with abnormal signs first day of antibiotics, Mean (SD)    | 2.5 (4.3)                           | 2.3 (4.3)     | 2.5 (6.9)                           | 2.3 (4.4)     | 2.0 (2.9)                      | 2.6 (5.7)     | 1.7 (2.8)                      | 1.8 (2.7)     |
| Patients with abnormal signs first day of antibiotics, Median (IQR) | 0 (0-4)                             | 0 (0-4)       | 1 (0-4)                             | 1 (0-4)       | 0 (0-4)                        | 1 (0-4)       | 0 (0-3)                        | 0 (0-3)       |
| <b>Counts of patients with extended courses of antibiotics</b>      |                                     |               |                                     |               |                                |               |                                |               |
| ≥3 days antibiotics beyond last day of abnormal signs, Count (%)    | 410 (39.8)                          | 939 (33.7)    | 519 (37.6)                          | 1590 (35.8)   | 58 (45.0)                      | 373 (36.1)    | 63 (32.6)                      | 420 (32.9)    |
| ≥5 days antibiotics beyond last day of abnormal signs, Count (%)    | 285 (27.6)                          | 587 (21.1)    | 351 (25.4)                          | 902 (20.3)    | 38 (29.5)                      | 206 (20.0)    | 34 (17.6)                      | 192 (15.0)    |

**eTable 3.** Clinical signs on the first day of antibiotics (primary analysis vs sensitivity analyses restricted to patients with discharge diagnosis codes for pneumonia and patients with negative blood and sputum cultures)

|                                                                                                            | All Patients                          |                                        | Patients with Discharge Codes for Pneumonia |                                        | Patients with Negative Blood and Sputum Cultures |                                        |
|------------------------------------------------------------------------------------------------------------|---------------------------------------|----------------------------------------|---------------------------------------------|----------------------------------------|--------------------------------------------------|----------------------------------------|
|                                                                                                            | Hospital-Acquired Pneumonia (N=2,733) | Community-Acquired Pneumonia (N=9,540) | Hospital-Acquired Pneumonia (N=530)         | Community-Acquired Pneumonia (N=3,228) | Hospital-Acquired Pneumonia (N=582)              | Community-Acquired Pneumonia (N=1,994) |
| <b>Frequency of normal signs on the first day of antibiotics</b>                                           |                                       |                                        |                                             |                                        |                                                  |                                        |
| Maximum temperature >36 and <38° C                                                                         | 1935 (70.8)                           | 7499 (78.6)                            | 367 (69.3)                                  | 2374 (73.5)                            | 298 (51.2)                                       | 1333 (66.9)                            |
| Median daily respiratory rate ≤22 breaths/minute                                                           | 2182 (79.8)                           | 7779 (81.5)                            | 449 (84.7)                                  | 2596 (80.4)                            | 434 (74.6)                                       | 1520 (76.2)                            |
| Maximum WBC count >4,000 and <12,000 cells/mm <sup>3</sup>                                                 | 1326 (48.5)                           | 5253 (55.1)                            | 261 (49.3)                                  | 1646 (51.0)                            | 259 (44.5)                                       | 928 (46.5)                             |
| Not on supplemental oxygen                                                                                 | 1468 (53.7)                           | 5028 (52.7)                            | 298 (56.2)                                  | 1686 (52.2)                            | 255 (43.8)                                       | 892 (44.7)                             |
| Oxygen saturation ≥95% without supplemental oxygen                                                         | 955 (34.9)                            | 3717 (39.0)                            | 197 (37.2)                                  | 1217 (37.7)                            | 153 (26.3)                                       | 614 (30.8)                             |
| Median respiratory rate <22 breaths/minute and oxygen saturation ≥95% without supplemental oxygen          | 877 (32.1)                            | 3506 (36.8)                            | 191 (36.0)                                  | 1150 (35.6)                            | 134 (23.0)                                       | 565 (28.3)                             |
| All signs normal                                                                                           | 370 (13.5)                            | 1779 (18.7)                            | 84 (15.9)                                   | 526 (16.3)                             | 41 (7.0)                                         | 196 (9.8)                              |
|                                                                                                            |                                       |                                        |                                             |                                        |                                                  |                                        |
| <b>Days until clinical signs normal for patients with abnormal sign(s) on the first day of antibiotics</b> |                                       |                                        |                                             |                                        |                                                  |                                        |
| Temperature, Mean (SD)                                                                                     | 2.0 (1.9)                             | 1.6 (1.3)                              | 2.3 (2.6)                                   | 1.6 (1.2)                              | 2.2 (2.0)                                        | 1.7 (1.3)                              |
| Temperature, Median (IQR)                                                                                  | 1 (1-2)                               | 1 (1-2)                                | 1 (1-3)                                     | 1 (1-2)                                | 1 (1-3)                                          | 1 (1-2)                                |
| White blood cell count, Mean (SD)                                                                          | 5.7 (6.5)                             | 3.7 (4.1)                              | 5.2 (5.8)                                   | 3.3 (3.2)                              | 6.1 (7.7)                                        | 4.3 (4.5)                              |
| White blood cell count, Median (IQR)                                                                       | 3 (2-7)                               | 2 (1-4)                                | 3 (2-6)                                     | 2 (1-4)                                | 3 (2-7)                                          | 3 (1-5)                                |
| Median respiratory rate, Mean (SD)                                                                         | 2.6 (3.0)                             | 2.2 (2.2)                              | 2.7 (3.1)                                   | 2.2 (2.0)                              | 2.5 (2.2)                                        | 2.6 (2.4)                              |
| Median respiratory rate, Median (IQR)                                                                      | 2 (1-3)                               | 1 (1-3)                                | 2 (1-3)                                     | 1 (1-3)                                | 2 (1-3)                                          | 2 (1-3)                                |
| Off supplemental oxygen, Mean (SD)                                                                         | 3.8 (4.1)                             | 4.1 (4.1)                              | 4.1 (4.1)                                   | 4.0 (3.7)                              | 3.3 (3.7)                                        | 4.4 (4.6)                              |
| Off supplemental oxygen, Median (IQR)                                                                      | 2 (1-5)                               | 3 (1-6)                                | 2 (1-5)                                     | 3 (1-6)                                | 2 (1-4)                                          | 3 (1-6)                                |
| Off supplemental oxygen and saturation ≥95%, Mean (SD)                                                     | 5.8 (8.2)                             | 4.5 (5.4)                              | 4.9 (5.8)                                   | 4.4 (5.0)                              | 7.5 (10.8)                                       | 5.6 (6.5)                              |
| Off supplemental oxygen and saturation ≥95% Median (IQR)                                                   | 3 (1-7)                               | 3 (1-6)                                | 3 (1-6)                                     | 3 (1-6)                                | 4 (2-9)                                          | 4 (2-7)                                |
| Median resp rate <22 and O <sub>2</sub> saturation ≥95%, Mean (SD)                                         | 4.9 (5.5)                             | 3.5 (4.3)                              | 4.4 (5.5)                                   | 3.1 (3.1)                              | 4.9 (5.5)                                        | 3.5 (3.2)                              |
| Median resp rate <22 and O <sub>2</sub> saturation ≥95%, Median (IQR)                                      | 3 (1-6)                               | 2 (1-4)                                | 3 (1-5)                                     | 2 (1-4)                                | 4 (1-6)                                          | 3 (1-5)                                |
| All signs normal, Mean (SD)                                                                                | 7.2 (8.8)                             | 5.0 (5.7)                              | 6.1 (6.4)                                   | 4.8 (5.1)                              | 9.1 (11.4)                                       | 6.2 (6.5)                              |
| All signs normal, Median (IQR)                                                                             | 4 (2-9)                               | 3 (2-6)                                | 4 (2-8)                                     | 3 (2-6)                                | 5 (3-11)                                         | 4 (2-8)                                |

**eTable 4.** Duration of antibiotics relative to clinical signs (primary analysis vs sensitivity analysis restricted to patients with discharge diagnosis codes for pneumonia and patients with negative blood and sputum cultures)

|                                                                         | All Patients                          |                                        | Patients with Discharge Codes for Pneumonia |                                        | Patients with Negative Sputum and Blood Cultures |                                        |
|-------------------------------------------------------------------------|---------------------------------------|----------------------------------------|---------------------------------------------|----------------------------------------|--------------------------------------------------|----------------------------------------|
|                                                                         | Hospital-Acquired Pneumonia (N=2,733) | Community-Acquired Pneumonia (N=9,540) | Hospital-Acquired Pneumonia (N=530)         | Community-Acquired Pneumonia (N=3,228) | Hospital-Acquired Pneumonia (N=582)              | Community-Acquired Pneumonia (N=1,994) |
| <b>Total duration of treatment in days</b>                              |                                       |                                        |                                             |                                        |                                                  |                                        |
| All patients, Mean (SD)                                                 | 6.8 (7.2)                             | 5.6 (5.6)                              | 7.5 (5.4)                                   | 6.4 (5.3)                              | 8.0 (7.1)                                        | 7.3 (5.6)                              |
| All patients, Median (IQR)                                              | 5 (3-8)                               | 5 (2-7)                                | 7 (4-9)                                     | 6 (3-8)                                | 7 (4-9)                                          | 6 (4-9)                                |
| Patients with normal signs on first day of antibiotics, Mean (SD)       | 6.2 (9.6)                             | 4.7 (5.6)                              | 6.1 (4.7)                                   | 5.3 (5.4)                              | 6.9 (5.1)                                        | 6.0 (4.8)                              |
| Patients with normal signs on first day of antibiotics, Median (IQR)    | 5 (3-7)                               | 4 (1-6)                                | 5 (3-8)                                     | 5 (2-7)                                | 6 (4-8)                                          | 5 (2-8)                                |
| Patients with abnormal signs on first day of antibiotics, Mean (SD)     | 6.9 (6.4)                             | 5.9 (5.6)                              | 7.8 (5.5)                                   | 6.6 (5.3)                              | 8.0 (7.2)                                        | 7.4 (5.7)                              |
| Patients with abnormal signs on first day of antibiotics, Median (IQR)  | 6 (3-8)                               | 5 (2-7)                                | 7 (5-9)                                     | 6 (3-8)                                | 7 (4-10)                                         | 7 (4-9)                                |
|                                                                         |                                       |                                        |                                             |                                        |                                                  |                                        |
| <b>Duration of treatment beyond the last day of abnormal signs</b>      |                                       |                                        |                                             |                                        |                                                  |                                        |
| All patients, Mean (SD)                                                 | 3.2 (6.2)                             | 2.5 (4.5)                              | 3.7 (5.0)                                   | 3.1 (4.4)                              | 2.8 (4.7)                                        | 3.0 (4.6)                              |
| All patients, Median (IQR)                                              | 1 (0-5)                               | 1 (0-4)                                | 2 (0-5)                                     | 2 (0-5)                                | 0 (0-4)                                          | 1 (0-4)                                |
| Patients with abnormal signs on first day of antibiotics, Mean (SD)     | 2.4 (5.7)                             | 2.3 (4.3)                              | 3.0 (4.2)                                   | 2.9 (4.4)                              | 2.6 (4.6)                                        | 2.8 (4.5)                              |
| Patients with abnormal signs on first day of antibiotics, Median (IQR)  | 0 (0-4)                               | 0 (0-4)                                | 2 (0-5)                                     | 2 (0-4)                                | 0 (0-4)                                          | 1 (0-4)                                |
|                                                                         |                                       |                                        |                                             |                                        |                                                  |                                        |
| <b>Counts of patients with extended courses of antibiotics</b>          |                                       |                                        |                                             |                                        |                                                  |                                        |
| ≥3 days of antibiotics beyond the last day of abnormal signs, Count (%) | 1050 (38.4)                           | 3322 (34.8)                            | 259 (48.9)                                  | 1436 (44.5)                            | 219 (37.6)                                       | 784 (39.3)                             |
| ≥5 days of antibiotics beyond the last day of abnormal signs, Count (%) | 708 (25.9)                            | 1887 (19.8)                            | 168 (31.7)                                  | 844 (26.2)                             | 129 (22.2)                                       | 485 (24.3)                             |

**eTable 5.** Clinical signs on the first day of antibiotics in immunocompetent vs immunocompromised patients

|                                                                                                            | Immunocompetent Patients              |                                        | Immunocompromised Patients          |                                        |
|------------------------------------------------------------------------------------------------------------|---------------------------------------|----------------------------------------|-------------------------------------|----------------------------------------|
|                                                                                                            | Hospital-Acquired Pneumonia (N=2,004) | Community-Acquired Pneumonia (N=7,745) | Hospital-Acquired Pneumonia (N=729) | Community-Acquired Pneumonia (N=1,795) |
| <b>Frequency of normal signs on the first day of antibiotics</b>                                           |                                       |                                        |                                     |                                        |
| Daily maximum temperature >36 and <38° C                                                                   | 1480 (73.9)                           | 6174 (79.7)                            | 455 (62.4)                          | 1325 (73.8)                            |
| Median daily respiratory rate ≤22 breaths/minute                                                           | 1585 (79.1)                           | 6257 (80.8)                            | 597 (81.9)                          | 1522 (84.8)                            |
| Daily maximum WBC count >4,000 and <12,000 cells/mm <sup>3</sup>                                           | 1056 (52.7)                           | 4446 (57.4)                            | 270 (37.0)                          | 807 (45.0)                             |
| Not on supplemental oxygen                                                                                 | 1041 (52.0)                           | 4053 (52.3)                            | 427 (58.6)                          | 975 (54.3)                             |
| Oxygen saturation ≥95% without supplemental oxygen                                                         | 658 (32.8)                            | 2977 (38.4)                            | 297 (40.7)                          | 740 (41.2)                             |
| Median respiratory rate <22 breaths/minute and oxygen saturation ≥95% without supplemental oxygen          | 593 (29.6)                            | 2789 (36.0)                            | 284 (39.0)                          | 717 (39.9)                             |
| All signs normal                                                                                           | 297 (14.8)                            | 1525 (19.7)                            | 73 (10.0)                           | 254 (14.2)                             |
| <b>Days until clinical signs normal for patients with abnormal sign(s) on the first day of antibiotics</b> |                                       |                                        |                                     |                                        |
| Temperature, Mean (SD)                                                                                     | 1.8 (1.6)                             | 1.5 (1.2)                              | 2.3 (2.4)                           | 2.0 (1.6)                              |
| Temperature, Median (IQR)                                                                                  | 1 (1-2)                               | 1 (1-2)                                | 1 (1-3)                             | 1 (1-2)                                |
| White blood cell count, Mean (SD)                                                                          | 4.9 (5.4)                             | 3.2 (3.4)                              | 7.3 (8.1)                           | 5.3 (5.6)                              |
| White blood cell count, Median (IQR)                                                                       | 3 (1-6)                               | 2 (1-4)                                | 4 (2-9)                             | 3 (2-7)                                |
| Median respiratory rate, Mean (SD)                                                                         | 2.6 (3.1)                             | 2.1 (2.2)                              | 2.8 (2.7)                           | 2.3 (2.1)                              |
| Median respiratory rate, Median (IQR)                                                                      | 2 (1-3)                               | 1 (1-2)                                | 2 (1-3)                             | 2 (1-3)                                |
| Off supplemental oxygen, Mean (SD)                                                                         | 3.6 (4.0)                             | 4.0 (4.0)                              | 4.5 (4.4)                           | 5.0 (4.5)                              |
| Off supplemental oxygen, Median (IQR)                                                                      | 2 (1-5)                               | 3 (1-5)                                | 3 (1-6)                             | 4 (2-7)                                |
| Off supplemental oxygen and saturation ≥95%, Mean (SD)                                                     | 5.8 (8.5)                             | 4.3 (5.2)                              | 5.9 (7.2)                           | 5.6 (6.1)                              |
| Off supplemental oxygen and saturation ≥95%, Median (IQR)                                                  | 3 (1-7)                               | 3 (1-5)                                | 3 (2-8)                             | 4 (2-7)                                |
| Median resp rate <22 and oxygen saturation ≥95%, Mean (SD)                                                 | 4.4 (4.9)                             | 3.2 (3.8)                              | 6.0 (6.5)                           | 4.5 (5.6)                              |
| Median resp rate <22 and oxygen saturation ≥95%, Median (IQR)                                              | 3 (1-5)                               | 2 (1-4)                                | 4 (2-8)                             | 3 (2-5)                                |
| All signs normal, Mean (SD)                                                                                | 6.8 (8.5)                             | 4.6 (5.1)                              | 8.3 (9.3)                           | 6.7 (7.1)                              |
| All signs normal, Median (IQR)                                                                             | 4 (2-8)                               | 3 (2-6)                                | 5 (2-11)                            | 5 (2-8)                                |

**eTable 6.** Duration of antibiotics relative to clinical signs in immunocompetent vs immunocompromised patients

|                                                                         | Immunocompetent Patients              |                                        | Immunocompromised Patients          |                                        |
|-------------------------------------------------------------------------|---------------------------------------|----------------------------------------|-------------------------------------|----------------------------------------|
|                                                                         | Hospital-Acquired Pneumonia (N=2,004) | Community-Acquired Pneumonia (N=7,745) | Hospital-Acquired Pneumonia (N=729) | Community-Acquired Pneumonia (N=1,795) |
| <b>Total duration of treatment in days</b>                              |                                       |                                        |                                     |                                        |
| All patients, Mean (SD)                                                 | 6.2 (6.3)                             | 5.2 (5.1)                              | 8.4 (9.0)                           | 7.4 (7.1)                              |
| All patients, Median (IQR)                                              | 5 (3-8)                               | 5 (2-7)                                | 6 (3-10)                            | 6 (3-9)                                |
| Patients with normal signs on first day of antibiotics, Mean (SD)       | 5.1 (4.3)                             | 4.2 (5.1)                              | 7.3 (9.9)                           | 6.9 (8.6)                              |
| Patients with normal signs on first day of antibiotics, Median (IQR)    | 5 (2-7)                               | 3 (1-6)                                | 6 (3-8)                             | 5 (2-8)                                |
| Patients with abnormal signs on first day of antibiotics, Mean (SD)     | 6.4 (6.5)                             | 5.4 (5.1)                              | 8.5 (8.8)                           | 7.4 (6.8)                              |
| Patients with abnormal signs on first day of antibiotics, Median (IQR)  | 5 (3-8)                               | 5 (2-7)                                | 7 (3-10)                            | 6 (3-9)                                |
|                                                                         |                                       |                                        |                                     |                                        |
| <b>Duration of treatment beyond the last day of abnormal signs</b>      |                                       |                                        |                                     |                                        |
| All patients, Mean (SD)                                                 | 3.0 (6.1)                             | 2.4 (4.4)                              | 3.6 (6.3)                           | 2.9 (5.1)                              |
| All patients, Median (IQR)                                              | 1 (0-5)                               | 1 (0-4)                                | 0 (0-5)                             | 1 (0-4)                                |
| Patients with abnormal signs on first day of antibiotics, Mean (SD)     | 2.2 (5.6)                             | 2.2 (4.3)                              | 3.0 (5.9)                           | 2.7 (4.5)                              |
| Patients with abnormal signs on first day of antibiotics, Median (IQR)  | 0 (0-4)                               | 0 (0-3)                                | 0 (0-4)                             | 0 (0-4)                                |
|                                                                         |                                       |                                        |                                     |                                        |
| <b>Counts of patients with extended courses of antibiotics</b>          |                                       |                                        |                                     |                                        |
| ≥3 days of antibiotics beyond the last day of abnormal signs, Count (%) | 771 (38.5)                            | 2672 (34.5)                            | 279 (38.3)                          | 650 (36.2)                             |
| ≥5 days of antibiotics beyond the last day of abnormal signs, Count (%) | 612 (30.5)                            | 1684 (21.7)                            | 200 (27.4)                          | 434 (24.2)                             |
